# Supplementary material for: Association Testing of the Protein Tyrosine Phosphatase 1B Gene (PTPN1) With Type 2 Diabetes in 7,883 People
Source: Oxford University Press journal article supplement (doi:10.2337/diabetes.54.6.1884), 2005-06-01
Supplement: pg1884onlineappendix.doc [file pg1884onlineappendix.doc]

Supplementary Table 1: Genotyping assays of SNPs in *PTPN1*

| **SNP** | **Base** | **Forward PCR primer** | **Reverse PCR primer** | **Extension probe** | **Probe direction** | **Assay result** |
| --- | --- | --- | --- | --- | --- | --- |
| **rs6020546** | C/T | AGCGGATAACAGAGAGTGCCGTAGATTCAG | AGCGGATAACGCCTACCAATGGTATCATGC | GGGTGGCCCCAAATCAGCAAACAT | F |  |
| rs4811074 | C/T | AGCGGATAACTGGTGTCCTTAAAGATGTGC | AGCGGATAACGCGTATCATAGGTGCTTAAT | TGTGCTTTATGAAAGATAGTTTT | F | Failed HW |
| rs7260893 | C/T | AGCGGATAACGAGGCATAGACCAATGTCTG | AGCGGATAACGCTAGCCGTACTATTTATGG | TCTGTATGTTTATATGAGTCC | F | Failed genotyping |
| **rs6012949** | A/G | AGCGGATAACACCCTCAGAGCTGAAGAGC | AGCGGATAACGAATTGGCCACATGATGCGC | CAGAGCTGAAGAGCACACTC | F |  |
| **rs718630** | A/C | AGCGGATAACACACACCTGCTTTGTGCTAG | AGCGGATAACGAACTTAGGCCAAGAGACTC | CCTGCTTTGTGCTAGGCACTTTAC | F |  |
| **rs6063528** | A/C | AGCGGATAACTACTACAGGATCCACGACTG | AGCGGATAACGGGTATGGAATGATCCTCTC | TTGGTCTTAGCAATCTGCAC | R |  |
| **rs6020560** | C/T | AGCGGATAACGCAGAGGGATTGGATTAGAG | AGCGGATAACAGAGCTTCTTTTCCCTGGTG | CTCATTGATCCAACTGAAGCTCAC | R |  |
| rs6020566 | A/G | AGCGGATAACTACAGGGACAGGAATGAACC | AGCGGATAACTTGGGTTCTGGTTTGTCTGG | CCCTGTTTTTGTTCCAGG | F |  |
| **rs3787334** | C/T | AGCGGATAACCTGCGGTACCCACTCCATTG | AGCGGATAACCGTTAACCTTCCTGAGTCCC | GAGTCCCTGCCTGAAAG | R |  |
| **rs932420** | C/T | AGCGGATAACCCAACCACACCTTACAAAAC | AGCGGATAACTGATCCTGGACTAACTGATC | TCCTTGTAAAAACTGCAGC | R |  |
| **rs2426157** | A/G | AGCGGATAACTTCTCCTGTGTCCTGGATTC | AGCGGATAACACAGCCATGTATGTGGAAGC | GAAGCTGAAGCAGTGGCCACAC | R |  |
| rs3787335 | G/T | AGCGGATAACTATCAAGGCTTCTGTCACCC | AGCGGATAACTGGGACATGAGGTGATGATG | CCCTGGCCCATGTCAGTGCATT | F |  |
| rs6126033 | C/T | AGCGGATAACCTGGTTTGGAATTTCCTGAG | AGCGGATAACTCTTCAGGGCTGAACTAAGG | TTTCCTGAGATTTTGATCTTGCCA | F | Failed genotyping |
| rs6095998 | A/G | AGCGGATAACTGGGATCTTAGGGCTACTTC | AGCGGATAACACAGGGCTACCATGGTTACC | ATCTTAGGGCTACTTCCCTATAA | F | MONO |
| **rs6067484** | A/G | AGCGGATAACGTCATCTACCTACCTAACAG | AGCGGATAACCAACTGCATTCACGGAATAC | ACAGATGGCTATCACACTGCCT | R |  |
| **rs6020594** | A/G | AGCGGATAACTGGAGGAAGAGTGTATAGCC | AGCGGATAACTTGCTAGAAACAGATCCGGG | GCAATAGTTGTTTATAAGGCCT | F |  |
| **rs941798** | A/G | AGCGGATAACTTTCCTCCCATTCACACTCC | AGCGGATAACACCCTGAAGTATGGAGAACC | CTCCAAATTGTGCACCAAAGT | F |  |
| rs1570179 | T/C | AGCGGATAACACTACTGCAAGAGTTCCAGG | AGCGGATAACGACAGAGCTAGATTGAAGGG | GATTGAAGGGAAATGCAGAA | R |  |
| rs6096004 | C/T | AGCGGATAACGAGAAGGGTGTTAAACCCAG | AGCGGATAACCACACAGGCATAAAAGCCAG | GCATAAAAGCCAGTTTATCCTTGC | R | MONO |
| **rs2426159** | A/G | AGCGGATAACCAGAATAGCAGAATGTGGAC | AGCGGATAACCACTGATCTTGTGGAAAATTG | CAAGGAGTCAAATAGTACC | F |  |
| **rs734589** | C/T | AGCGGATAACGCATCCTGACCTGACTTATG | AGCGGATAACCACACGTTCTACACCAAGTC | CTAGGTCCATTTTTAGACCC | F |  |
| rs3787345 | C/T | AGCGGATAACTTTTGGCTGGTGAGAGTGTG | AGCGGATAACTCTAGGTACTGAATGGAGGC | GAGTGTGGCTACCTCTG | F |  |
| **rs2038526** | C/T | AGCGGATAACTTGCATCTGGGTCTAGCCAC | AGCGGATAACCGTGGTGAGACTTGGATTTG | CCACCTCTCCTTCTTGACT | F |  |
| **rs6020608** | C/T | AGCGGATAACACCAGAATGAAAGGGCAAGC | AGCGGATAACAGAGGCTGAGCAGTTATCAC | CAGAGAAGGCTTGGAGAC | R |  |
| rs754118 | C/T | AGCGGATAACACCTCTAGAACCTAACTGGG | AGCGGATAACTGACAGAAGAGGAAACGGAG | AAACGGAGACACTGTGATGAGCT | R |  |
| rs2230605 | G/A | AGCGGATAACCACCAGCCTCATTCTTGAAC | AGCGGATAACATCAGCCAGACAGAAGGTTC | GGCTGAGTGACCCTGACTC | R |  |
| rs968701 | G/A | AGCGGATAACGCTCTGCTGTGATGTTTTTTC | AGCGGATAACCAGTGAGTCTCTGTATTTTGG | TTCCTAAGTAGAAACTGAAGC | R |  |
| rs11575938 | T/C | AGCGGATAACTCCAGACAGCCGACCAGCT | AGCGGATAACCACCTTCGATCACAGCCAG | GATCACAGCCAGGTAGGA | R | MONO |
| rs2282147 | A/G | AGCGGATAACTTCCAAGTACATGGCTGCAG | AGCGGATAACCTGGTTTGTCAGGAAATCCC | TTTGTCAGGAAATCCCTTTGCATG | R |  |
| rs2230604 | T/C | AGCGGATAACATCAGTGGAAGGAGCTTTCC | AGCGGATAACATTGTGTGGCTCCAGGATTC | GACCTGGAGCCCCCACC | F |  |
| rs718049 | C/T | AGCGGATAACTGAAACCCTGTGGATGCAGC | AGCGGATAACAATACCGGACCTCCAGCAGC | ATCCTTGGGGAACAGGG | F |  |
| rs718050 | A/G | AGCGGATAACCCCATTTTACTTCCTTGCAG | AGCGGATAACGTTAACTCAGTACACCACAC | CAGTACACCACACATATCAA | R |  |
| rs3787348 | G/T | AGCGGATAACAACTAGAACATGTCCCCTGG | AGCGGATAACATCACATCACTGTCCATGGG | CTTTGGGTCTGCCTTTTTCC | R |  |
| G381S | G/A | AGCGGATAACAAGTTAGAAGTCGGGTCGTG | AGCGGATAACTAACTCAGTGCATGGTCCTC | GCTGGGGAGGCAGCCTGGGCAC | R |  |
| P387L | C/T | AGCGGATAACAAGTTAGAAGTCGGGTCGTG | AGCGGATAACTAACTCAGTGCATGGTCCTC | TGCCCAGGCTGCCTCCC | F |  |
| T420M | C/T | AGCGGATAACTGAGTTACTGGAAGCCCTTC | AGCGGATAACTACCCTGTAGCAGAGGTAAG | ATGTGCGTGGCTACGGTCCTCA | F | MONO |
| IVS9+C57T | C/T | AGCGGATAACATGTTTCCACTGACAGACGC | AGCGGATAACGAACTGAATCCTACCATCGG | GTGTGCAGAGAGCACTGGC | F | MONO |
| IVS9+G58A | G/A | AGCGGATAACATGTTTCCACTGACAGACGC | AGCGGATAACCCACAGAACTGAATCCTACC | AATCCTACCATCGGGCTAG | R | Failed genotyping |
| ins1484G | O/G | ACGTTGGATGAGGCATGCCGCGGTAGGTAA | ACGTTGGATGTAGTGCAGAACCAACGTCCG | CGGGGCCCGGCTCTCTAC | R |  |
| rs1057207 | G/T | AGCGGATAACTTCAGGTGTGTGTGGATACG | AGCGGATAACTCTGTGAGGTCACAGAAGAC | GACCCTGAGACACTCCCCCC | R | MONO |
| rs6020622 | A/C | AGCGGATAACAGATAGTCTAGGTCAACCTG | AGCGGATAACGGCTTCCAATCAATCTAAAGG | AGGTTTTTTTCCCCGTTTCTTTC | R | MONO |
| **rs914458** | C/G | AGCGGATAACTCCACAGACTGCTCAGAAGG | AGCGGATAACTGTCTTCATGCCATCGGACG | CGCACTGAAGCTGAGAAA | R |  |

Genotyping assays for 42 SNPs in *PTPN1*, showing the sequences of the PCR primers and the extension probe, its direction (forward or reverse) and reasons for assay failure. Genotyping was performed by mass spectroscopy detection of allele-specific primer extension products (see text for details). SNPs in bold indicate those obtained from the HapMap website ([www.hapmap.org](http://www.hapmap.org/)). Failed HW, failed Hardy-Weinberg equilibrium in the CEPH reference panel; failed genotyping, genotyping rate <75% or >1 Mendel errors; MONO, monomorphic SNP in the CEPH reference panel. Thirty one of 42 SNPs passed assay design.

Supplementary Table 2: Genotype counts of individual SNPs in *PTPN1*

|  |  | GCI USA C/C | | GCI Poland C/C | | Canadian C/C | | Scandinavian C/C | | Sweden C/C | | Scandinavian sib pairs  (cases) | |
| --- | --- | --- | --- | --- | --- | --- | --- | --- | --- | --- | --- | --- | --- |
| **SNP** | Allele | Cases | Controls | Cases | Controls | Cases | Controls | Cases | Controls | Cases | Controls | Excess  allele 1 | Excess  allele 2 |
| rs6020546 | C/T | 2015 / 425 | 2009 / 413 | 1600 / 396 | 1659 / 349 | 170 / 30 | 173 / 33 | 787 / 147 | 765 / 165 | 850 / 150 | 795 / 203 | 30 | 44 |
| rs718630 | A/C | 1472 / 958 | 1409 / 1005 | 1108 / 880 | 1079 / 905 | 136 / 86 | 133 / 83 | 531 / 419 | 530 / 416 | 585 / 419 | 594 / 400 | 75 | 66 |
| **rs6067484** | A/G | 1796 / 642 | 1776 / 648 | 1422 / 574 | 1420 / 586 | 153 / 49 | 150 / 54 | 733 / 193 | 720 / 214 | 714 / 288 | 723 / 275 | 56 | 54 |
| **rs6020594** | A/G | 2398 / 28 | 2384 / 40 | 1946 / 56 | 1962 / 48 | 210 / 4 | 215 / 1 | 919 / 25 | 921 / 15 | 989 / 15 | 980 / 22 | 7 | 8 |
| **rs941798*** | A/G | 1340 / 1088 | 1328 / 1088 | 1172 / 830 | 1200 / 810 | 118 / 100 | 115 / 103 | 496 / 446 | 511 / 419 | 569 / 433 | 537 / 463 | 72 | 75 |
| **rs3787345*** | T/C | 1426 / 924 | 1383 / 935 | 1045 / 849 | 981 / 791 | 130 / 92 | 135 / 85 | 596 / 356 | 570 / 378 | 587 / 417 | 582 / 408 | 71 | 66 |
| **rs754118*** | C/T | 1562 / 848 | 1533 / 883 | 1226 / 768 | 1217 / 767 | 135 / 81 | 140 / 78 | 611 / 325 | 571 / 355 | 621 / 379 | 629 / 371 | 72 | 63 |
| **rs2230605** | A/G | 2323 / 43 | 2370 / 22 | 1973 / 13 | 1989 / 19 | 205 / 3 | 204 / 0 | 936 / 0 | 937 / 1 | 992 / 10 | 989 / 9 | 1 | 1 |
| **rs968701** | T/C | 1251 / 1159 | 1255 / 1153 | 971 / 1023 | 936 / 1024 | 107 / 103 | 113 / 103 | 501 / 423 | 466 / 440 | 501 / 497 | 517 / 481 | 73 | 70 |
| **rs2282147*** | C/T | 1562 / 852 | 1533 / 881 | 1222 / 766 | 1185 / 745 | 135 / 81 | 140 / 80 | 601 / 321 | 560 / 352 | 616 / 380 | 622 / 372 | 75 | 64 |
| **rs2230604** | C/T | 2253 / 185 | 2213 / 215 | 1817 / 183 | 1824 / 188 | 182 / 20 | 184 / 20 | 803 / 115 | 794 / 136 | 919 / 83 | 918 / 84 | 40 | 44 |
| **rs718049*** | T/C | 1515 / 883 | 1481 / 901 | 1136 / 796 | 1155 / 809 | 130 / 74 | 124 / 76 | 604 / 324 | 563 / 367 | 609 / 389 | 618 / 378 | 68 | 64 |
| **rs718050*** | G/A | 1535 / 903 | 1506 / 922 | 1174 / 826 | 1177 / 831 | 127 / 71 | 123 / 75 | 604 / 320 | 565 / 367 | 609 / 391 | 619 / 377 | 70 | 63 |
| **rs3787348*** | G/T | 1358 / 1074 | 1334 / 1080 | 1171 / 823 | 1189 / 799 | 120 / 100 | 115 / 103 | 501 / 451 | 520 / 422 | 576 / 428 | 543 / 457 | 69 | 74 |
| G381S | A/G | 2413 / 11 | 2412 / 10 | 1963 / 7 | 2000 / 8 | 212 / 0 | 208 / 0 | 938 / 0 | 939 / 1 | 995 / 7 | 996 / 4 | 0 | 1 |
| P387L | T/C | 2411 / 15 | 2355 / 17 | 1988 / 8 | 1990 / 6 | 220 / 2 | 218 / 2 | 950 / 2 | 948 / 2 | 999 / 7 | 977 / 19 | 5 | 8 |
| 1484insG | O/G | 2223 / 207 | 2247 / 179 | 1871 / 133 | 1803 / 147 | 202 / 16 | 198 / 22 | 883 / 71 | 868 / 72 | 919 / 83 | 927 / 77 | 20 | 23 |
| rs914458 | C/G | 1682 / 736 | 1711 / 711 | 1405 / 589 | 1426 / 576 | 141 / 81 | 146 / 72 | 694 / 266 | 694 / 256 | 712 / 272 | 663 / 317 | 54 | 64 |

Allele counts for each of the 18 tag SNPs in our diabetic subsamples; for each SNP, the major allele is presented first. SNPs in bold comprise a block of tight LD as defined by Gabriel *et al.* (25) (see Fig. 1). (*) SNPs reportedly associated with T2D in Bento *et al.* (13). C/C, case/control.

Supplementary Table 3: Whole-body insulin sensitivity index according to *PTPN1* haplotypes

| **Genotype** | WB-ISI | *P* |
| --- | --- | --- |
| A/A | 1.94 ± 0.24 |  |
| A/X | 1.92 0.22 |  |
| A/B or O/O | 1.95 0.24 | NS |
| B/X | 1.97 0.24 |  |
| B/B | 1.98 0.20 |  |
|  |  |  |
| Neutral model |  |  |
| A/X | 1.93 0.23 | 0.057 |
| B/X | 1.97 0.23 |  |
|  |  |  |
| Recessive model |  |  |
| A/A | 1.94 0.24 | NS |
| B/* | 1.96 0.23 |  |

The whole-body insulin sensitivity index (WB-ISI) was calculated in the 766 Scandinavian control subjects for whom we had OGTT data (22). Values were logarithmically transformed because of non-normality; they are expressed as mean ± S.D. Genotypic groups: A/A, homozygotes for haplotype A; A/X, carriers of haplotype A, excluding A/B heterozygotes; A/B, A/B heterozygotes; O/O, non-A, non-B haplotype carriers; B/X, carriers of haplotype B, excluding A/B heterozygotes; B/B, homozygotes for haplotype B; B/*, carriers of haplotype B, including A/B heterozygotes. ANOVA was used to compare >2 groups, and two-sided t tests were used to compare 2 groups.
